RESEARCH ARTICLE

# Comparison of the induced fields using different coil configurations during deep transcranial magnetic stimulation

Mai Lu<sup>1\*</sup>, Shoogo Ueno<sup>2</sup>

**1** Key Lab. of Opt-Electronic Technology and Intelligent Control of Ministry of Education, Lanzhou Jiaotong University, Lanzhou, 730070, Gansu Province, P. R. China, **2** Department of Applied Quantum Physics, Graduate School of Engineering, Kyushu University, Fukuoka 812-8581, Japan

\* [mai.lu@hotmail.com](mailto:mai.lu@hotmail.com)

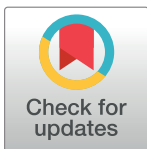

## Abstract

Stimulation of deeper brain structures by transcranial magnetic stimulation (TMS) plays a role in the study of reward and motivation mechanisms, which may be beneficial in the treatment of several neurological and psychiatric disorders. However, electric field distributions induced in the brain by deep transcranial magnetic stimulation (dTMS) are still unknown. In this paper, the double cone coil, H-coil and Halo-circular assembly (HCA) coil which have been proposed for dTMS have been numerically designed. The distributions of magnetic flux density, induced electric field in an anatomically based realistic head model by applying the dTMS coils were numerically calculated by the impedance method. Results were compared with that of standard figure-of-eight (Fo8) coil. Simulation results show that double cone, H- and HCA coils have significantly deep field penetration compared to the conventional Fo8 coil, at the expense of induced higher and wider spread electrical fields in superficial cortical regions. Double cone and HCA coils have better ability to stimulate deep brain subregions compared to that of the H-coil. In the mean time, both double cone and HCA coils increase risk for optical nerve excitation. Our results suggest although the dTMS coils offer new tool with potential for both research and clinical applications for psychiatric and neurological disorders associated with dysfunctions of deep brain regions, the selection of the most suitable coil settings for a specific clinical application should be based on a balanced evaluation between stimulation depth and focality.

## OPEN ACCESS

**Citation:** Lu M, Ueno S (2017) Comparison of the induced fields using different coil configurations during deep transcranial magnetic stimulation. PLoS ONE 12(6): e0178422. <https://doi.org/10.1371/journal.pone.0178422>

**Editor:** Tifei Yuan, Nanjing Normal University, CHINA

**Received:** December 9, 2016

**Accepted:** May 12, 2017

**Published:** June 6, 2017

**Copyright:** © 2017 Lu, Ueno. This is an open access article distributed under the terms of the [Creative Commons Attribution License](https://creativecommons.org/licenses/by/4.0/), which permits unrestricted use, distribution, and reproduction in any medium, provided the original author and source are credited.

**Data Availability Statement:** All relevant data are within the paper.

**Funding:** This work is supported in part by the National Nature Science Foundation of China (No. 51267010, 51567015), and in part by the Gansu Science Fund for Distinguished Young Scholars (No. 1308RJDA013). There was no additional external funding received for this study.

**Competing interests:** The authors have declared that no competing interests exist.

## Introduction

Transcranial magnetic stimulation (TMS) is a technique to stimulate the brain noninvasively. Magnetic fields are produced by passing a strong current through an electromagnetic coil placed upon the scalp that in turn induce electric field and eddy-currents in the underlying cortical tissue, thereby producing a localized axonal depolarization. TMS has become a major tool in brain research and the treatment of various psychiatric and neurological disorders [1–3]. In principle, any brain-related disorder that is associated with pathological activity of

specific brain sites may be treated by this method. Treatment of depression was the first major therapeutic goal set for TMS [4]. Other potential applications include schizophrenia [5], Parkinson's disease [6], Alzheimer's disease [7], and various addictions [8–11]. In recent years, it has been demonstrated that depression is a disease affecting multiple brain regions [12, 13], which are associated with reward circuits [14, 15], such as the nucleus accumbens (NA), the ventral tegmentum area (VTA), amygdala, and medial prefrontal, cingulate. These brain areas normally lie at depths of approximately 6–7 cm. The standard TMS with round [16] and Fo8 [17] coils has been shown to be effective in the treatment of depression with a common target in the dorsolateral prefrontal cortex (DLPFC), which was assumed to be at the depth 2–2.5 cm from the surface of the head. The size of the magnetic field generated by this technique is not sufficient to reach the deeper cortical, subcortical and limbic areas. For this reason, despite the fact that superficial TMS has proved to be moderately effective in treating drug-resistant depression, it is hypothesized that deep TMS stimuli, which reach a much greater depth, may be more effective in increasing the antidepressant effect. To stimulate deeper neuronal regions such as reward-related pathways directly using traditional TMS, much higher stimulation intensities are needed, as the electric field decreases rapidly as a function of tissue depth. However, even if stimulation intensities could be highly increased at the source, the use of standard TMS at such high stimulation intensities does not allow safe stimulation and can lead to undesirable side effects. These limitations have led to the development of novel coil designs suitable for dTMS, which allows direct stimulation of much larger and deeper brain regions by significant reduction of the decay rate. In the past decade, there are several coil configurations potentially suitable for dTMS: double cone, H- and HCA coils.

The double cone coil can be considered as a larger Fo8 coil with an fixed angle of about 95 degree between the two wings [18]. Stimulation of regions at depth of 3–4 cm, such as the leg motor area, can be achieved using the double cone coil [19]. It has also been used for direct activation of the pelvic floor and lower limb motor representation at the interhemispheric fissure, as well as for transsynaptic activation of the anterior cingulate cortex via stimulation of the medial frontal cortex [20].

Another coil design for dTMS is called H-coil [21–24]. The H-coil was composed of a base portion running tangential to the scalp and return portions removed from the head. The coil with complicated winding patterns and larger dimensions is designed to generate summation of the electric field in a specific brain region at a depth of 4–6 cm by locating coil elements at different locations around this region, all of which have a common current component which induce electric field in the desired direction.

A family of dTMS coil designs called Halo coil, a large circular coil capable of being placed around the head was developed to provide subthreshold electric field in deep brain tissues. It has been proposed to work with the conventional circular coil at the top of the head. The Halo-circular assembly coil (HCA coil) enables the stimulation of the brain at greater depth with greater flexibility than is currently achievable with the conventional round coil [25, 26]. In order to stimulate deeper brain regions while decreasing the electrical field in superficial cortical regions, the coaxial circular (CC) coils was also developed [27, 28].

Among the dTMS coil design mentioned above, both double cone and H-coils have been applied in the practical clinical applications [29–31]. However, no study has been implemented to compare the field distributions in deep brain tissues by double cone, H-, and HCA coils in the same realistic head model. In the present work, we used the impedance method to numerically calculate the electric field induced in a realistic head model by employing the double cone, H- and HCA coils, and results were compared with that of conventional Fo8 coil. We first examined the characteristics of magnetic flux density (B-field) in head model by employing all four coils and investigated the B-field characteristics in deep brain subregions. Then we

analysed the impact of coil configurations on the induced electric field (E-field) in the surface of gray matter (GM) and white matter (WM), as well as in deep brain subregions. Since the coils, especially the H- and HCA coils were placed around the head, close to both eyebrows, safety concern about the excitation of visual tissues was therefore arisen. We therefore focused on investigating the induced E-field in eyeball tissues and optical nerve by using different coil designs.

## Methods

### Coil design

Three coil designs for dTMS have been numerically designed as shown in Fig 1, where Fig 1 (a)–1(c) show the double cone coil, H-coil and Halo coil which are placed on the surface of the head model. For comparison, Fig 1(d) shows the modelled Fo8 coil.

The double cone coil was composed with two large circular coils with a fixed angle (95 deg) between them. The inner and outer radii of the circular wings are 20 mm and 70 mm, respectively. The number of the wire turns in each wing is 10. The H-coil was composed of base and return portions. The coil is designed to minimize the unintended stimulation of portions of the brain, while reducing the accumulation of the surface charges. The Halo coil with 5 turns has inner and outer radii of 138 and 150mm, respectively. It is operated simultaneously with a typical circular coil of mean diameter 90 mm and 14 turns located 100 mm above the Halo coil. For comparison, we have also modeled the figure-of-eight coil. The inner and outer radii of the circular wings are 10 mm and 50 mm, respectively. The number of the wire turns in each wing is 10. The same pulse currents with amplitude of  $I = 5.0$  kA and working frequency 2.381 kHz was fed into each of the four coils.

### Realistic head model

The realistic head model was obtained from a man model (Duke, 34-year-old male) developed by Virtual Family project [32]. The head model consists of 36 different kind of tissues, including several important deep brain regions, such as thalamus, hippocampus, pons, etc. The head model is composed of 10 million cubic voxels with resolution of 1mm. Fig 2 shows the head model with transparency of muscle, skull, GM, WM, cerebellum and visual tissues.

### Tissue conductivity and numerical method

The electrical conductivity of head tissues are modeled using the four-Cole-Cole model [33]. In this model, the head tissues subject to an electric field with angular frequency is modelled

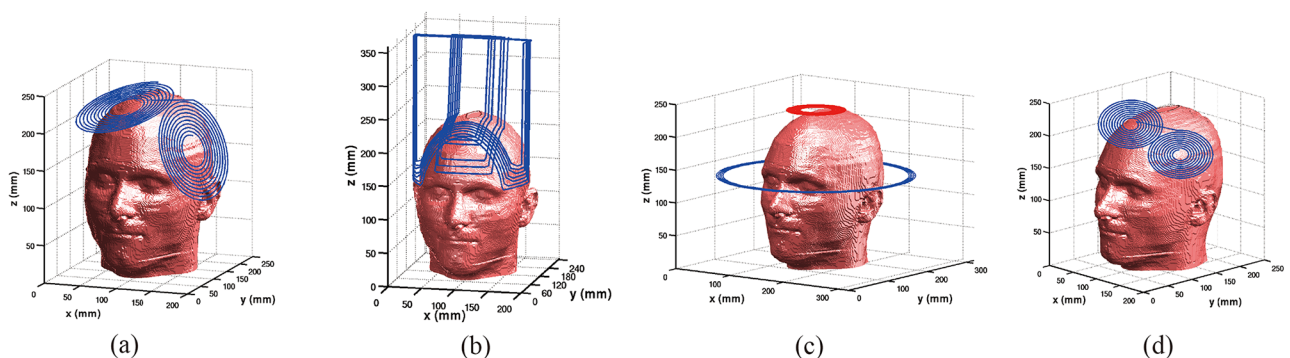

**Fig 1. Realistic head model with coils (a) Double cone coil, (b) H-coil, (c) HCA coil and (d) Fo8 coil.**

<https://doi.org/10.1371/journal.pone.0178422.g001>

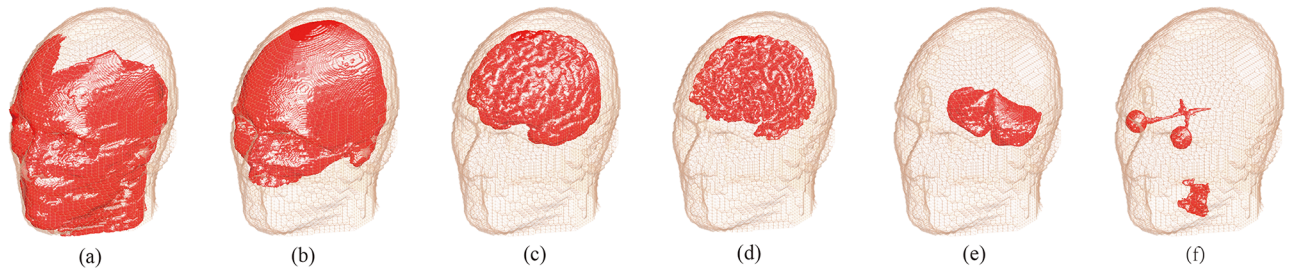

**Fig 2. Transparency of the head tissues (a) Muscle, (b) Skull, (c) Gray matter (d)White matter, (e) Cerebellum and (f) Eye ball with visual nerves.**

<https://doi.org/10.1371/journal.pone.0178422.g002>

by relaxation theory and tissue conductivity can be calculated by fitting to experimental measurements [34–36]. In the present head model, since the number of tissue type is more than that in original Gabriel list [36], various tissues in the head model have been simulated with conductivities of similar tissues (i.e. thalamus, hippocampus, pons, etc have the same conductivity as that of brain grey matter). The conductivities of head tissues used in the simulations are shown in Table 1.

The head model was described using a uniform 3D Cartesian grid and is composed of 10 million cubic voxels. Assuming that the electric conductivities are isotropic and constant in all direction in each voxel, the head model is represented as a 3D network of impedances. The magnetic fields and the induced electric fields were calculated using the impedance method

**Table 1. Tissue conductivities (f = 2381 Hz).**

| Tissue             | Conductivity $\sigma$ [S/m] | Tissue           | Conductivity $\sigma$ [S/m] |
|--------------------|-----------------------------|------------------|-----------------------------|
| Artery             | 7.00e-01                    | Hypothalamus     | 5.26e-01                    |
| Blood. Vessel      | 3.10e-01                    | Mandible         | 2.03e-02                    |
| Cartilage          | 1.75e-01                    | Marrow-bone      | 2.44e-03                    |
| Cerebellum         | 1.24e-01                    | MO* <sup>3</sup> | 4.65e-01                    |
| CSF                | 2.00e+00                    | Midbrain         | 4.65e-01                    |
| CA* <sup>1</sup>   | 6.44e-02                    | Mucosa           | 8.46e-04                    |
| CP* <sup>2</sup>   | 6.44e-02                    | Muscle           | 3.31e-01                    |
| Connective-tissue  | 2.04e-01                    | Nerve            | 3.04e-02                    |
| Ear-cartilage      | 1.75e-01                    | Pineal-body      | 5.26e-01                    |
| Ear-skin           | 2.00e-04                    | Pons             | 4.65e-01                    |
| Eye-cornea         | 4.25e-01                    | Skin             | 2.00e-04                    |
| Eye-lens           | 3.31e-01                    | Skull            | 2.03e-02                    |
| Eye-sclera         | 5.07e-01                    | Spinal-cord      | 3.04e-02                    |
| Eye-vitreous-humor | 1.50e+00                    | Teeth            | 2.03e-02                    |
| FAT                | 2.32e-02                    | Thalamus         | 1.04e-01                    |
| Gray matter        | 1.04e-01                    | Tongue           | 2.76e-01                    |
| Hippocampus        | 1.04e-01                    | Vein             | 7.00e-01                    |
| Hypophysis         | 5.26e-01                    | White Matter     | 6.44e-02                    |

\*<sup>1</sup>CA: Commissura-anterior;

\*<sup>2</sup>CP: Commissura-posterior;

\*<sup>3</sup>MO: Medulla-oblongata.

<https://doi.org/10.1371/journal.pone.0178422.t001>



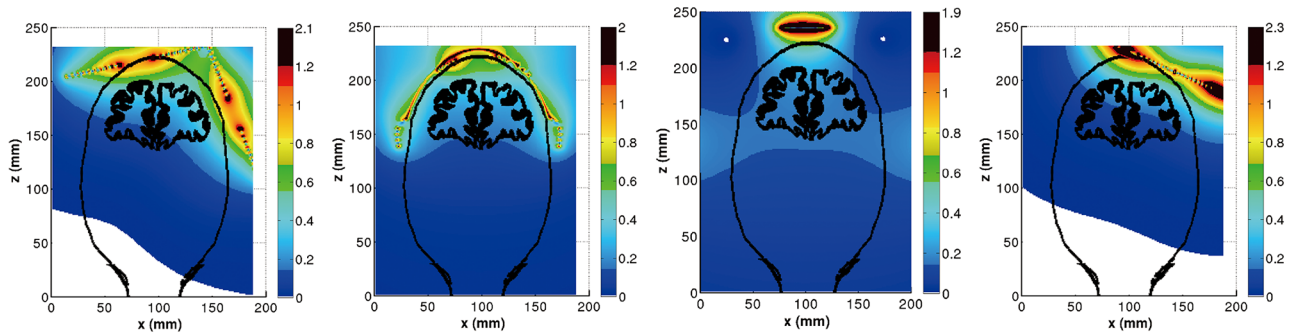

**Fig 3. Distribution of B-field (Tesla) with the contour outline of scalp and GM in the coronal slice of  $y = 80$  mm.** (a) Double cone coil, (b) H-coil, (c) HCA coil and (d) Fo8 coil.

<https://doi.org/10.1371/journal.pone.0178422.g003>

[37–39]. we have successfully employed the impedance method in the modelling of brain stimulation and electromagnetic dosimetry [40, 41].

### Results

The distribution of B-field in the coronal slice ( $y = 80$  mm) for double cone, H-, HCA and Fo8 coils are shown in Fig 3(a)–3(d). The contour outlines of scalp and gray matter were also included in each of the figures. As expected, higher magnetic field is presented on the coil surface. However, the B-field decays quickly. It was found the stimulation depth in the brain were significantly increased by double cone, H- and HCA coil (Fig 3(a)–3(c)) compared to that by Fo8 coil (Fig 3(d)).

A quantitative comparison of B-field along the test lines at different depths in the same coronal slice of  $y = 80$ mm are shown in Fig 4. For the depth of 35 mm (Fig 4(a)), the maximum values of B-field in brain tissues were obtained by double cone coil. The B-field produced by H-coil is smaller than that of double cone coil, but larger than that of HCA coil. The B-field produced by Fo8 coil is also larger than that of HCA coil in part of the head tissues. For the depth of 65 mm (Fig 4(b)), both H- and HCA coils produced largest B-field in center part of

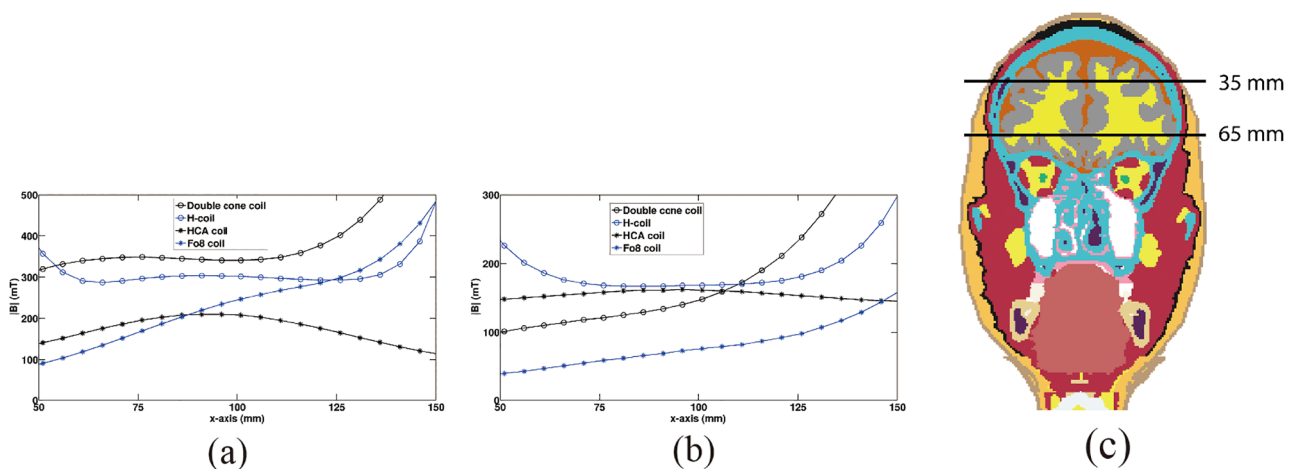

**Fig 4. Comparison of B-field along the test lines.** (a) test line is located at the depth of 35 mm, (b) test line is located at the depth of 65 mm, and (c) Tissue slice in the coronal plane ( $y = 80$  mm) with two test lines at different depths.

<https://doi.org/10.1371/journal.pone.0178422.g004>

**Table 2. Maximum values of magnetic flux density (mT) in deep brain subregions.**

|                      | Double cone coil | H-coil | HCA coil | Fo8 coil |
|----------------------|------------------|--------|----------|----------|
| Cerebellum           | 49               | 75     | 161      | 16       |
| Commissure-Anterior  | 101              | 130    | 172      | 38       |
| Commissure-Posterior | 54               | 98     | 157      | 19       |
| Hippocampus          | 101              | 98     | 155      | 31       |
| Hypophysis           | 77               | 104    | 149      | 28       |
| Hypothalamus         | 83               | 111    | 156      | 30       |
| Medalla-Oblongate    | 22               | 50     | 119      | 8        |
| Midbrain             | 80               | 109    | 162      | 28       |
| Pinealbody           | 50               | 96     | 157      | 18       |
| Pons                 | 52               | 81     | 140      | 18       |
| Thalamus             | 102              | 134    | 184      | 36       |

<https://doi.org/10.1371/journal.pone.0178422.t002>

the brain. However, the double cone coil still produced largest B-field in head tissue which were located just under the coil.

The maximum values of B-field in major brain subregions for double cone, H-, HCA and Fo8 coils are presented in Table 2. It was found the high value of magnetic field in brain subregions are always presented by HCA coil.

The comparison of the electric field distribution on the surfaces of GM and WM for all four coils are shown in Fig 5. The GM and WM surfaces were represented by red color, while the

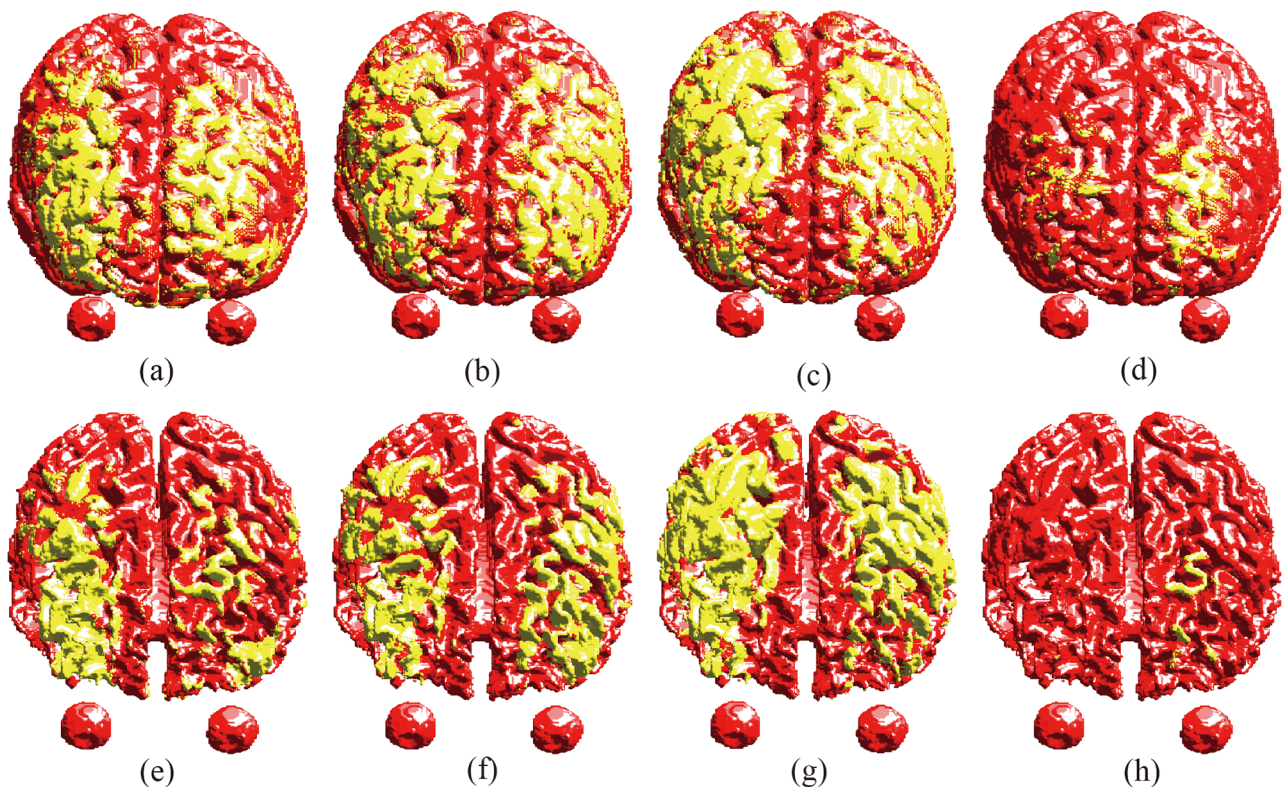

**Fig 5. Electric field distributions on the cortical surfaces.** Top row: Gray matter, Double cone coil (a), H-coil (b), HCA coil (c) and Fo8 coil (d). Bottom row: White matter, Double cone coil (e), H-coil (f), HCA coil (g) and Fo8 coil (h).

<https://doi.org/10.1371/journal.pone.0178422.g005>

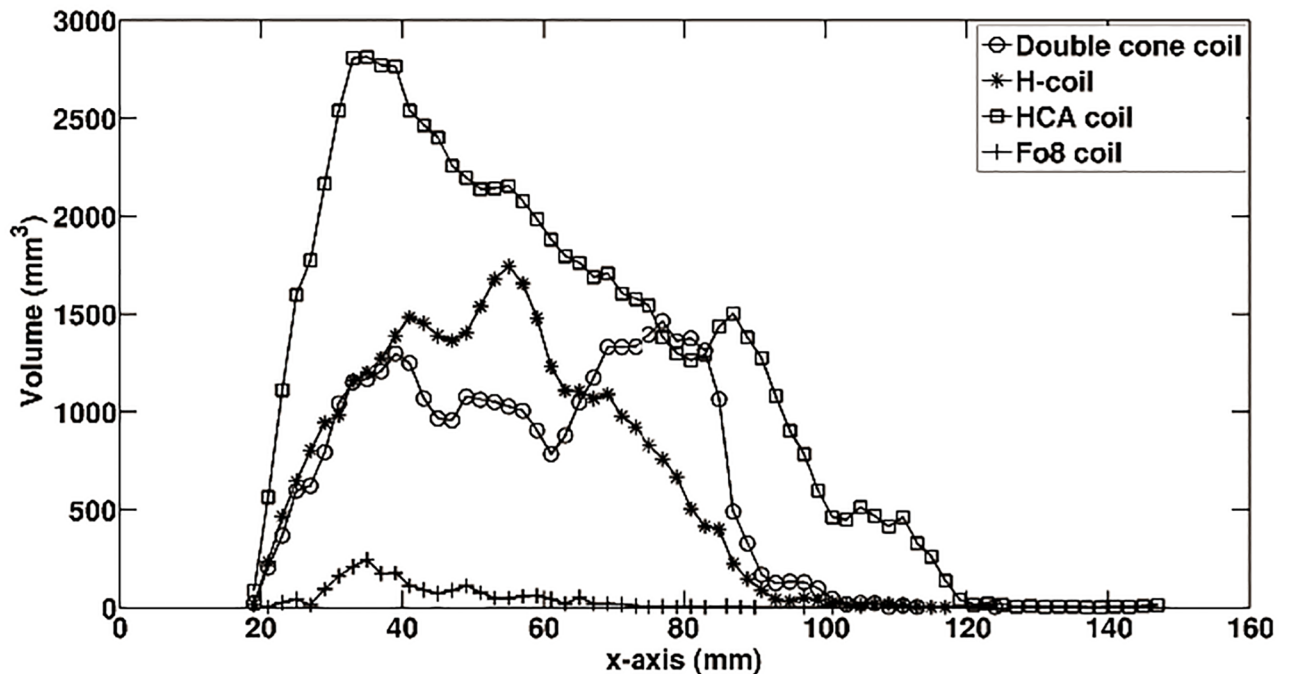

**Fig 6. Relationship between the brain tissue volume with  $E > 100$  V/m and the field penetration depths.**

<https://doi.org/10.1371/journal.pone.0178422.g006>

magnitude of electric field higher than 100 V/m (neuron excitation threshold) was represented by yellow color. It can be found the double cone, H- and HCA coils induce electric fields in wide area on the surfaces of GM and WM. Especially for the HCA coil, it produces wide electric field at the periphery of the GM and WM surfaces. Compared to these dTMS coils, Fo8 coil induces much more focal electric fields.

Fig 6 shows the dependence of brain volume with electric fields beyond 100 V/m on the distance from the vertex of the head. It can be found the HCA coil has significant depth penetration. It also shows the electric field decays much slower. However, the brain tissue volume potential stimulated by HCA coil is larger compared to both double cone coil and H-coil. It clearly observed the Fo8 coil presents very focal stimulation in superficial cortical regions.

Fig 7 shows E-field in brain tissues along the test lines at different depths from the scalp at coronal slice of  $y = 80$  mm in the lateral medial direction for all four coils. It can be found the

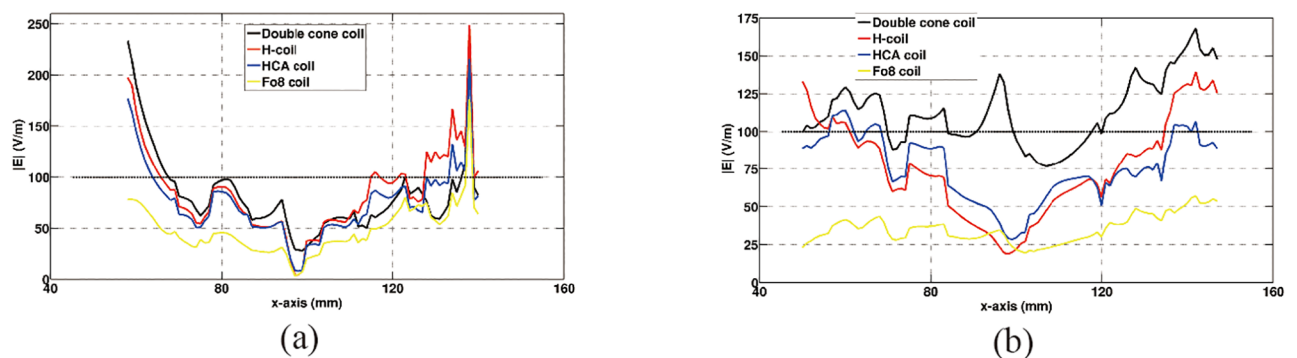

**Fig 7. Comparison of electric field in brain tissues at different depth. (a) depth of 35 mm and (b) depth of 65 mm.**

<https://doi.org/10.1371/journal.pone.0178422.g007>

**Table 3. Maximum electric field (V/m) in brain subregions.**

|                      | Double cone coil | H-coil | HCA coil | Fo8 coil |
|----------------------|------------------|--------|----------|----------|
| Cerebellum           | 79.1             | 103.4  | 319.0    | 133.3    |
| Commissure-Anterior  | 85.2             | 10.3   | 21.9     | 22.2     |
| Commissure-Posterior | 4.2              | 6.1    | 10.1     | 5.1      |
| Hippocampus          | 73.8             | 80.9   | 120.8    | 22.5     |
| Hypophysis           | 129.6            | 49.6   | 81.3     | 43.2     |
| Hypothalamus         | 134.3            | 17.6   | 32.7     | 35.3     |
| Medalla-Oblongate    | 16.1             | 12.9   | 35.0     | 2.5      |
| Midbrain             | 69.9             | 33.5   | 56.2     | 15.3     |
| Pinealbody           | 15.2             | 10.0   | 12.8     | 4.1      |
| Pons                 | 5.0              | 18.3   | 34.6     | 98.2     |
| Thalamus             | 86.2             | 28.7   | 47.7     | 21.7     |

<https://doi.org/10.1371/journal.pone.0178422.t003>

curves look similar for double cone, H- and HCA coils at the depth of 35 mm (Fig 7(a)). The electric field beyond 100 V/m were presented at the outer region of the brain. However, for the depth of 65 mm (Fig 7(b)), only double cone produces larger electric field beyond 100 V/m in both internal and outer regions of the brain.

Table 3 presents the maximum induced electric field in deep brain subregions by applying the double cone, H-, HCA, and Fo8 coils. It can be found the maximum electric field in brain subregions are produced by either double cone or HCA coil. The H-coil produces smaller electric fields in these deep brain subregions.

Since the coils such as H- and HCA coils were placed around the head, close to both eye-bows, safety concern about the excitation of visual tissues was therefore arisen. Fig 8 shows the electric field distribution in eyeball and optical nerves by employing all four coils. The slices were position in the cross section plane, 92 mm in depth from the top of the head. It was clearly observed the electric fields in optical nerve is larger than that in eyeball tissues for four coils. For both double cone and HCA coils, since the maximum electric fields in optical nerve is 144 V/m and 97 V/m, respectively, beyond or very close to 100 V/m the neuron stimulation threshold. It suggests the increased risk for optical nerve excitation in using double cone and HCA coil.

### Discussions

TMS is based upon the principle of electromagnetic induction. A stimulation coil produces a transient magnetic field in the brain which induces an electric field in conducting tissue. Most of the previous literatures focused on the induced electric fields in brain tissues. Little information has been published on the distribution of the B-field produced by standard TMS coils

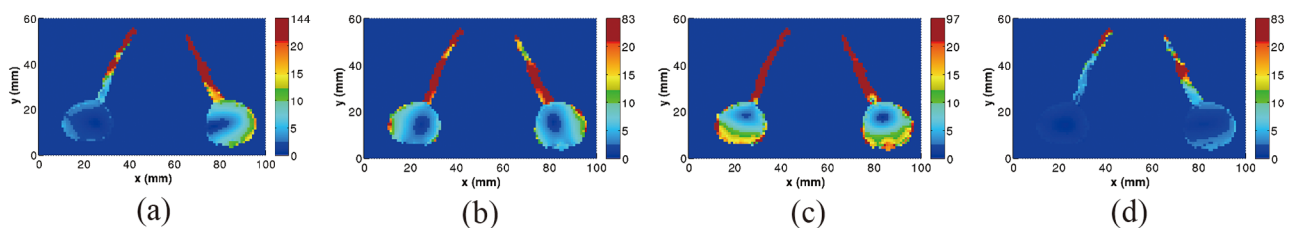

**Fig 8. Comparison of the electric field distribution (V/m) in eyeball tissue and optical nerve for double cone coil (a), H-coil (b), HCA coil (c) and Fo8 coil (d).**

<https://doi.org/10.1371/journal.pone.0178422.g008>



except for recently studies [42]. In our present study, we have firstly investigated the spatial variation of B-field produced by dTMS coils. We have observed that all three dTMS coils produce regions of relatively strong B-field in deep brain regions compared with that of Fo8 coil (see Fig 3). This implies that stimulation of deep brain tissues is due to this strong field.

Comparison of induced electric field in spherical head model by dTMS coils have been well addressed by Deng et al [43]. However, since the geometry of human head is obviously significantly different from the spherical head model, the shape of head surface is varied for individualized head model, and the brain tissue heterogeneity and anisotropy were not accounted in the spherical model, the obtained electric field in spherical head model could no represent the real situation. In this study, we presented the comparison of induced electric field in realistic head model by employing double cone coil and H-coil which have been employed in clinical applications for treatment for several neuro-psychiatric disorders, and the HCA coil which is promising for dTMS with flexible structure for adjustable stimulation depth. All these three dTMS coils improve the stimulation depth remarkable at the expense of reduced focality compared to the conventional Fo8 coil (see Fig 5). Especially for the HCA coil, the brain tissue volume with  $E > 100$  V/m is much larger than that of H- and double cone coils (see Fig 6). At depth of 30–40 mm, the brain volume stimulated above threshold are almost same for both double cone and H-coils (see Fig 6). Considering the fact that double cone coil was originally developed to stimulate the leg motor area, which is 3 to 4 cm in depth. It is expected the H-coil also can be employed to stimulate this area. At depth of 40–60 mm, the brain volume stimulated above threshold by H-coil is larger than that of double cone coil. Which implies the stimulation focality of double cone coil is better than that of H-coil at this depth. At depth of 60–80 mm, the brain volume stimulated above threshold by H-coil decreases quickly. While it increases for double cone coil. This result is in agreement with previous study [44], where the authors have found that double cone coil generates a deeper stimulation compared to the H-coil.

Detailed comparison of B-field and E-field in realistic head model between dTMS coils and standard Fo8 coil have been presented in this paper. It was found higher B-field is presented on the coil surface for both dTMS and standard coils. However, the B-field decays slowly away from the coil surface for dTMS coils relative to the Fo8 coil (Fig 3). For this reason, dTMS coils generate stronger electric field that penetrates deeper and stimulates a wider portion of the brain compared to standard Fo8 coil.

There were several limitations in the current study. First, results in this paper are based on the realistic head model with isotropic tissue properties. The tissue anisotropy in particular of the white matter should be incorporated in realistic head model which will show a more precise induced electric field in brain tissues. Second, the distribution of E-field in brain tissues was not optimized as only one set of coil and current parameters were implemented. We plan to study the influence of induced field by varying the coil parameters, their relative positions and different pulse current schemes to improve the stimulation focality in specific deep brain regions that are correlated to specific neural disorders.

## Conclusions

In this paper, typical coil designs such as double cone, H- and HCA coils which were employed for dTMS have been numerically designed. 3D distributions of magnetic flux density, induced electric field in realistic head model using dTMS coils were obtained by the impedance method. Results were compared with that of Fo8 coil. It was found that deeper electric field penetration is obtained by double cone, H- and HCA coils through reducing the rate of decay of the field as a function of distance, which inevitable induce higher and wider spread electrical



fields in superficial cortical regions. Both double cone and HCA coils have better ability to stimulate deep brain subregions, but with the risk of optical nerve excitation. The H-coil, on the contrary, has less penetration depth compared with the double cone and HCA coils. In dTMS application, since there exist no coil configuration that is capable of achieving both deep stimulation with improved facility, the selection of the most suitable coil setting should be based on a balance between the stimulation depth and focality.

## Acknowledgments

This work is supported in part by the National Nature Science Foundation of China (No. 51267010, 51567015), and in part by the Gansu Science Fund for Distinguished Young Scholars (No. 1308RJDA013). There was no additional external funding received for this study.

## Author Contributions

**Conceptualization:** ML SU.

**Data curation:** ML.

**Formal analysis:** ML SU.

**Funding acquisition:** ML.

**Investigation:** ML SU.

**Methodology:** ML SU.

**Project administration:** ML.

**Resources:** ML.

**Software:** ML.

**Supervision:** ML.

**Validation:** ML.

**Visualization:** ML.

**Writing – original draft:** ML.

**Writing – review & editing:** ML SU.

## References

1. Walsh V, Pascual-Leone A. *Transcranial Magnetic Stimulation A Neurochronometrics of Mind*. MIT Press.; 2003.
2. George MS, Belmaker RH. *Transcranial Magnetic Stimulation in Clinical Psychiatry*. ( First Edition). Arlington, TX: American Psychiatric Publishing.; 2007.
3. Holtzheimer PE, McDonald WM. *A Clinical Guide to Transcranial Magnetic Stimulation*. Oxford University Press.; 2014.
4. McNamara B, Ray JL, Arthurs OJ, Boniface S. Transcranial magnetic stimulation for depression and other psychiatric disorders. *Psychol Med*. 2001 Oct; 31(7):1141–1146. <https://doi.org/10.1017/S0033291701004378> PMID: 11681540
5. Prikryl R, Ustohal L, Prikrylova KH, Kasperek T, Venclikova S, Vrzalova M, et al. A detailed analysis of the effect of repetitive transcranial magnetic stimulation on negative symptoms of schizophrenia: a double-blind trial. *Schizophr Res*. 2013 Sep; 149(1–3):167–73. <https://doi.org/10.1016/j.schres.2013.06.015> PMID: 23810122

6. Fregni F, Simon DK, Wu A and Pascual-Leone A. Non-invasive brain stimulation for Parkinson's disease: a systematic review and meta-analysis of the literature. *J. Neurol. Neurosurg. Psychiatr.* 2005 DEC; 76(12):1614–1623. <https://doi.org/10.1136/jnnp.2005.069849> PMID: 16291882
7. Ferreri F, Pasqualetti P, Maatta S, Ponzo D, Guerra A, Bressi F, et al. Motor cortex excitability in Alzheimer's disease: a transcranial magnetic stimulation study. *Ann Neurol.* 2003 JAN; 53(1):102–108. <https://doi.org/10.1002/ana.10416> PMID: 12509853
8. Li X, Hartwell KJ, Owens M, Lematty T, Borckardt JJ, Hanlon CA, et al. Repetitive transcranial magnetic stimulation of the dorsolateral prefrontal cortex reduces nicotine cue craving. *Biol Psychiatry.* 2013 Apr; 73(8):714–720. <https://doi.org/10.1016/j.biopsych.2013.01.003> PMID: 23485014
9. Politi E, Fauci E, Santoro A, Smeraldi E. Daily sessions of transcranial magnetic stimulation to the left prefrontal cortex gradually reduce cocaine craving. *Am J Addict.* 2008 Jul-Aug; 17(4):345–346. <https://doi.org/10.1080/10550490802139283> PMID: 18612892
10. Shen Y, Cao XY, Tan T, Shan CL, Wang YJ, Pan JB, et al. 10-Hz Repetitive transcranial magnetic stimulation of the left dorsolateral prefrontal cortex reduces heroin cue craving in long-term addicts. *Biol Psychiatry.* 2016 Aug; 80(3):e13–e14. <https://doi.org/10.1016/j.biopsych.2016.02.006> PMID: 26995024
11. Shen Y, Cao XY, Shan CL, Dai WJ, Yuan TF. Heroin addiction impairs human cortical plasticity. *Biol Psychiatry.* 2017 Jun; 81(7):e49–e50. <https://doi.org/10.1016/j.biopsych.2016.06.013> PMID: 27567311
12. Manji HK, Drevets WC, Charney DS. The cellular neurobiology of depression. *Nat Med.* 2001 May; 7(5):541–547. <https://doi.org/10.1038/87865> PMID: 11329053
13. Nemeroff CB. Recent advances in the neurobiology of depression. *Psychopharmacol Bull.* 2002 Feb; 36(Suppl 2):6–23. PMID: 12490820
14. Breiter HC, Rosen BR. Functional magnetic resonance imaging of brain reward circuitry in the human. *Ann N Y Acad Sci.* 1999 Jun; 877(1):523–547. <https://doi.org/10.1111/j.1749-6632.1999.tb09287.x> PMID: 10415669
15. Nestler EJ, Carlezon WA Jr.. The mesolimbic dopamine reward circuit in depression. *Biol Psychiatry.* 2006 Jun; 59(12):1151–1159. <https://doi.org/10.1016/j.biopsych.2005.09.018> PMID: 16566899
16. Barker AT, Jalinous R, and Freeston IL. Non-invasive magnetic stimulation of human motor cortex. *Lancet.* 1985 May; 1:1106–1107. [https://doi.org/10.1016/S0140-6736\(85\)92413-4](https://doi.org/10.1016/S0140-6736(85)92413-4) PMID: 2860322
17. Ueno S, Tashiro T, Harada K. Localized stimulation of neural tissues in the brain by means of a paired configuration of time-varying magnetic fields. *J. Appl. Phys.* 1988 Nov; 64(10):5862–5864. <https://doi.org/10.1063/1.342181>
18. Lontis ER, Voigt M, Struijk JJ. Focality assessment in transcranial magnetic stimulation with double and cone coils. *J. Clin. Neurophysiol.* 2006 Oct; 23(5):462–471. <https://doi.org/10.1097/01.wnp.0000229944.63011.a1> PMID: 17016158
19. Kakuda W, Abo M, Nakayama Y, Kiyama A, Yoshida H. High-frequency rTMS using a double cone coil for gait disturbance. *Acta Neurol Scand.* 2013 Aug; 128(2):100–106. <https://doi.org/10.1111/ane.12085> PMID: 23398608
20. Kreuzer PM, Schecklmann M, Lehner A, Wetter TC, Poepl TB, Rupprecht R, et al. The ACDC pilot trial: targeting the anterior cingulate by double cone coil rTMS for the treatment of depression. *Brain Stimul.* 2015 Mar-Apr; 8(2):240–246. <https://doi.org/10.1016/j.brs.2014.11.014> PMID: 25541389
21. Yoth Y, Zangen A, Hallett M. A coil design for transcranial magnetic stimulation of deep brain regions. *J Clin Neurophysiol.* 2002 Aug; 19(4):361–370. <https://doi.org/10.1097/00004691-200208000-00008>
22. Yoth Y, Amir A, Levkovitz Y, Zangen A. Three-dimensional distribution of the electric field induced in the brain by transcranial magnetic stimulation using figure-8 and deep H-coils coil. *J Clin Neurophysiol.* 2007 Feb; 24(1):31–38
23. Huang YZ, Sommer M, Thickbroom G, Hamada M, Pascual-Leone A, Paulus W, et al. Consensus: New methodologies for brain stimulation. *Brain Stimul.* 2009 Jan; 2(1):2–13. <https://doi.org/10.1016/j.brs.2008.09.007> PMID: 20633398
24. Harel EV, Zangen A, Roth Y, Reti I, Braw Y, Levkovitz Y. H-coil repetitive transcranial magnetic stimulation for the treatment of bipolar depression: an add-on, safety and feasibility study. *World J Biol Psychiatry.* 2011 Mar; 12(2):119–126. <https://doi.org/10.3109/15622975.2010.510893> PMID: 20854181
25. Crowther LJ, Marketos P, Williams PI, Melikhov Y, Jiles DC. Transcranial magnetic stimulation: improved coil design for deep brain investigation. *J. Appl. Phys.* 2011 Apr; 109(7):07B314. <https://doi.org/10.1063/1.3563076>
26. Meng Y, Hadimani RL, Crowther LJ, Xu Z, Qu J, Jiles DC. Deep brain transcranial magnetic stimulation using variable "Halo coil" system. *J. Appl. Phys.* 2015 Mar; 117(7):17B305. <https://doi.org/10.1063/1.4913937>
27. Lu M, Ueno S. Numerical simulation of deep transcranial magnetic stimulation by multiple circular coils. *IFMBE Proceedings.* 2014; 41:1663–1666. [https://doi.org/10.1007/978-3-319-00846-2\\_410](https://doi.org/10.1007/978-3-319-00846-2_410)

28. Lu M, Ueno S. Computational study toward deep transcranial magnetic stimulation using coaxial circular coils. *IEEE Trans. Biomed. Eng.* 2015 Dec; 62(12):2911–2919. <https://doi.org/10.1109/TBME.2015.2452261> PMID: 26151931
29. Vanneste S, Ost J, Langguth B, De RD. TMS by double-cone coil prefrontal stimulation for medication resistant chronic depression: A case report. *Neurocase.* 2014 Oct; 20(1):61–68. <https://doi.org/10.1080/13554794.2012.732086> PMID: 23058173
30. Trebbastoni A, Raccach R, De LC, Zangen A, Inghilleri M. Repetitive deep transcranial magnetic stimulation improves verbal fluency and written language in a patient with primary progressive aphasia-logopenic variant (LPPA). *Brain Stimul.* 2013 Jul; 6(4):545–553. <https://doi.org/10.1016/j.brs.2012.09.014> PMID: 23122915
31. Spagnolo F, Volonté MA, Fichera M, Chieffo R, Houdayer E, Bianco M. Excitatory deep repetitive transcranial magnetic stimulation with H-coil as add-on treatment of motor symptoms in Parkinson's disease: an open label, pilot study. *Brain Stimul.* 2014 Mar-Apr; 7(2):297–300. <https://doi.org/10.1016/j.brs.2013.10.007> PMID: 24300835
32. Christ A, Kainz W, Hahn EG, Honegger K, Zefferer M, Neufeld E, et al. The virtual family-development of surface-based anatomical models of two adults and two children for dosimetric simulations. *Phys. Med. Biol.* 2010 DEC; 55(2):N23–N38. <https://doi.org/10.1088/0031-9155/55/2/N01> PMID: 20019402
33. Cole KS, Cole RH. Dispersion and absorption in dielectrics I. Alternating current characteristics. *J. Chem. Phys.* 1941 Apr; 9(4):341–351. <https://doi.org/10.1063/1.1750906>
34. Gabriel C, Gabriel S, and Corthout E. The dielectric properties of biological tissues: I. Literature survey. *Phys. Med. Biol.* 1996 Nov; 41(11):2231–2249. <https://doi.org/10.1088/0031-9155/41/11/001> PMID: 8938024
35. Gabriel S, Lau RW, Gabriel C. The dielectric properties of biological tissues: II. Measurements in the frequency range 10 Hz to 20 GHz. *Physics in Medicine and Biology.* *Phys. Med. Biol.* 1996 Nov; 41(11):2251–2269. <https://doi.org/10.1088/0031-9155/41/11/002> PMID: 8938025
36. Gabriel S, Lau RW, Gabriel C. The dielectric properties of biological tissues: III. Parametric models for the dielectric spectrum of tissues. *Phys. Med. Biol.* 1996 Nov; 41(11):2271–2293. <https://doi.org/10.1088/0031-9155/41/11/003> PMID: 8938026
37. Orcutt N, Gandhi OP. A 3-D impedance method to calculate power deposition in biological bodies subjected to time-varying magnetic-fields. *IEEE Trans. Biomed. Eng.* 1988 AUG; 35(8):577–583. <https://doi.org/10.1109/10.4590> PMID: 3049307
38. Nadeem M, Thorlin T, Gandhi OP, Persson M. Computation of electric and magnetic stimulation in human head using the 3D impedance method. *IEEE Trans. Biomed. Eng.* 2003 Jul; 50(7):900–907. <https://doi.org/10.1109/TBME.2003.813548> PMID: 12848358
39. Geeter ND, Crevecoeur G, Dupre L. An efficient 3-D eddy-current solver using an independent impedance method for transcranial magnetic stimulation. *IEEE Trans. Biomed. Eng.* 2011 Feb; 58(2):310–320. <https://doi.org/10.1109/TBME.2010.2087758> PMID: 20959261
40. Lu M, Ueno S, Thorlin T, Persson M. Calculating the current density and electric field in human head by multichannel transcranial magnetic stimulation. *IEEE Trans. Magn.* 2009 Mar; 45(3):1662–1665. <https://doi.org/10.1109/TMAG.2009.2012770>
41. Lu M, Ueno S. Dosimetry of exposure of patients to pulsed gradient magnetic fields in MRI. *IEEE Trans. Mag.* 2011 Oct; 47(10):3841–3844. <https://doi.org/10.1109/TMAG.2011.2157086>
42. Crowther LJ, Nlebedim IC, Jiles DC. Developments in deep brain stimulation using time dependent magnetic fields *J. Appl. Phys.* 2012 Mar; 111(7):07B325. <https://doi.org/10.1063/1.3676623>
43. Deng ZD, Lisanby SH, Peterchev AV. Coil design considerations for deep transcranial magnetic stimulation. *Clin. Neurophysiol.* 2014 Jun; 125(6):1202–1212. <https://doi.org/10.1016/j.clinph.2013.11.038> PMID: 24411523
44. Deng ZD, Lisanby SH, Peterchev AV. Electric field depth-focality tradeoff in transcranial magnetic stimulation: simulation comparison of 50 coil design. *Brain Stimul.* 2013 Jan; 6(1):1–13. <https://doi.org/10.1016/j.brs.2012.02.005> PMID: 22483681
